# Supplementary material for: High performance organic-inorganic hybrid barrier coating for encapsulation of OLEDs
Source: Royal Society of Chemistry journal article supplement (doi:10.1039/c0jm02008g), 2010-12-01
Supplement: c0jm02008g.pdf [file c0jm02008g.pdf]

**Supporting data of High Performance Organic-Inorganic Hybrid Barrier Coating for Encapsulation of OLEDs**

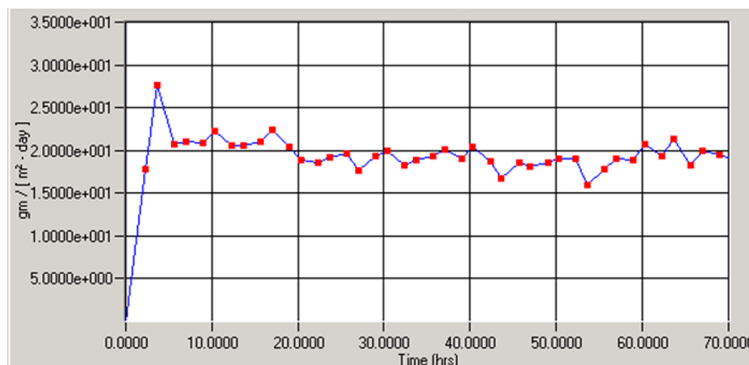

**Figure 1.** MOCON test result of the ED60 barrier coating film at 25°C and 90%R.H.

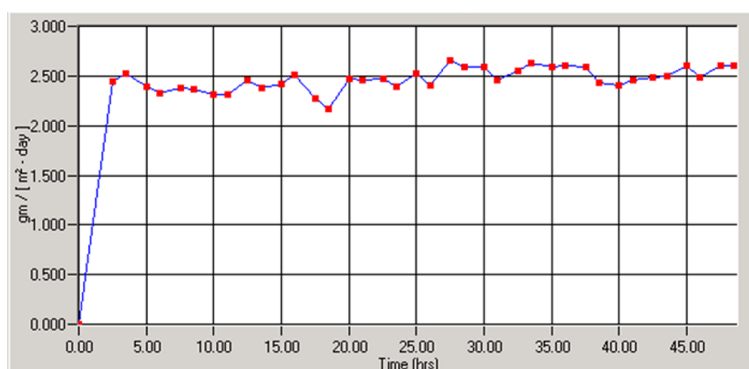

**Figure 2.** MOCON test result of a bare PET film at 25°C and 90%R.H.

**Table 1.** Water vapor transition rate (WVTR) and permeability (P) of the ED60 barrier coating film and a bare PET film at 25°C and 90% R.H.

|      | Ca test                |                            | MOCON test             |                            |
|------|------------------------|----------------------------|------------------------|----------------------------|
|      | WVTR                   | P                          | WVTR                   | P                          |
|      | (g/m <sup>2</sup> day) | (g/m <sup>2</sup> day/mil) | (g/m <sup>2</sup> day) | (g/m <sup>2</sup> day/mil) |
| ED60 | 2.5                    | 0.68                       | 2.5                    | 0.68                       |
| PET  | 24.4                   | 48.8                       | 20                     | 40                         |

1mil = 25.4µm
